# Supplementary material for: Olive Crown Porosity Measurement Based on Radiation Transmittance: An Assessment of Pruning Effect
Source: MDPI journal article supplement (doi:10.3390/s16050723), 2016-05-19
Supplement: s1 [file s1]

# Supplementary Materials: Olive Crown Porosity Measurement Based on Radiation Transmittance: An Assessment of Pruning Effect

Francisco J. Castillo-Ruiz, Sergio Castro-Garcia, Gregorio L. Blanco-Roldán, Rafael R. Sola-Guirado and Jesús A. Gil-Ribes

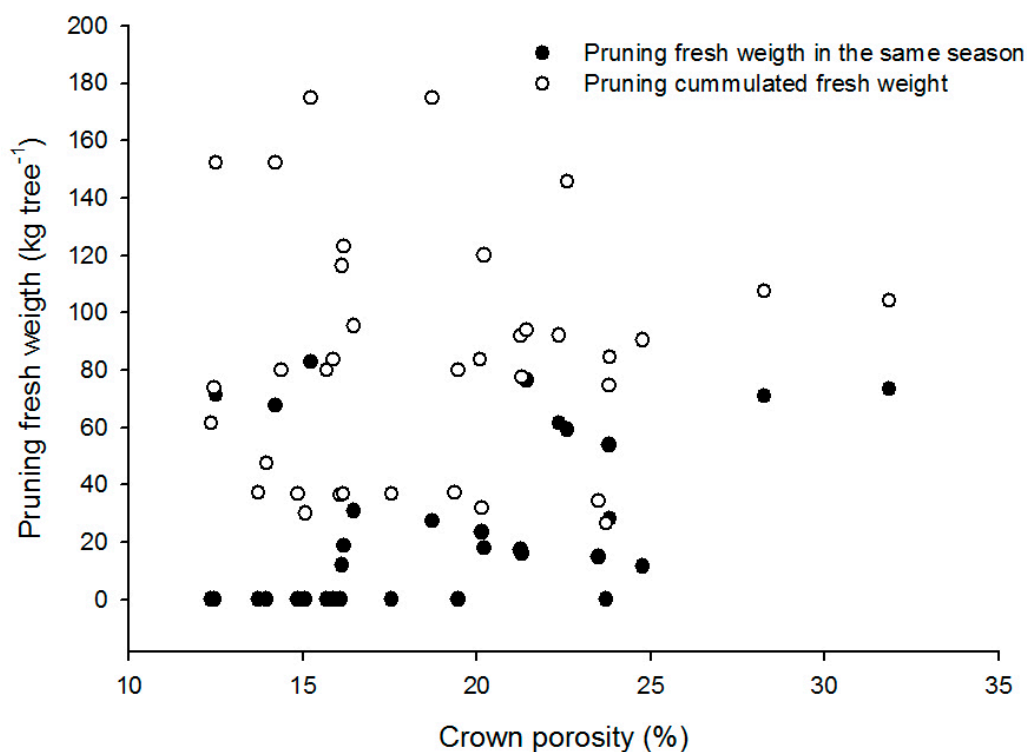

**Figure S1.** Pruning fresh weight relation with crown porosity.

**Table S1.** Tree dimensions for tested years in different olive cultivars for each pruning treatment. Values are mean  $\pm$  standard deviation. Different letters showed significant differences ( $q < 0.05$ ) according to Duncan's test between different pruning treatments and in the same year.

| Variety    | Year              | Pruning Treatment      | Skirt Height (m) | Tree Height (m) | Canopy Volume (m <sup>3</sup> ) |
|------------|-------------------|------------------------|------------------|-----------------|---------------------------------|
| Hojiblanca | 2013 <sup>1</sup> | Trunk shaker targeted  | 0.7 $\pm$ 0.1 a  | 4.1 $\pm$ 0.3 a | 92.2 $\pm$ 3.7 a                |
|            |                   | Canopy shaker targeted | 0.6 $\pm$ 0.1 a  | 4.1 $\pm$ 0.4 a | 97.4 $\pm$ 20.3 a               |
|            |                   | Mechanical             | 0.6 $\pm$ 0.1 a  | 3.6 $\pm$ 0.4 a | 82.3 $\pm$ 2.3 a                |
|            | 2014              | Trunk shaker targeted  | 0.6 $\pm$ 0.2 a  | 3.9 $\pm$ 0.2 a | 40.3 $\pm$ 9.2 a                |
|            |                   | Canopy shaker targeted | 0.5 $\pm$ 0.2 a  | 3.9 $\pm$ 0.3 a | 42.7 $\pm$ 9.6 a                |
|            |                   | Mechanical             | 0.4 $\pm$ 0.1 a  | 4 $\pm$ 0.5 a   | 67.5 $\pm$ 7.7 b                |
| Picual     | 2015              | Trunk shaker targeted  | 0.5 $\pm$ 0.1 b  | 3.9 $\pm$ 0.1 a | 59.5 $\pm$ 11.8 a               |
|            |                   | Canopy shaker targeted | 0.4 $\pm$ 0.1 b  | 3.8 $\pm$ 0.3 a | 63.7 $\pm$ 9 a                  |
|            |                   | Mechanical             | 0.3 $\pm$ 0.1 a  | 4.1 $\pm$ 0.1 b | 72.5 $\pm$ 19.2 a               |

<sup>1</sup> In 2013, tree crown measurements were taken before to carry out pruning.
